# Supplementary material
Source: PubMed Central journal article supplement (PMC1595431)
Supplement: pnas_0604248103_2.pdf [file pnas_0604248103_2.pdf]

# HemAT Sensor

C.  $^{13}\text{CO}$

Y133F

B.  $^{13}\text{CO}$

pD 8.5

A.  $^{12}\text{CO}$

pD 8.5

$\Delta A$

$\Delta A = 2 \times 10^{-3}$

1890

1980

2070

Wavenumbers ( $\text{cm}^{-1}$ )

-1876

1922

-2022

-1877

1923

-1967

-2018

-1928

-2065
