# Supplementary material
Source: PubMed Central journal article supplement (PMC1595431)

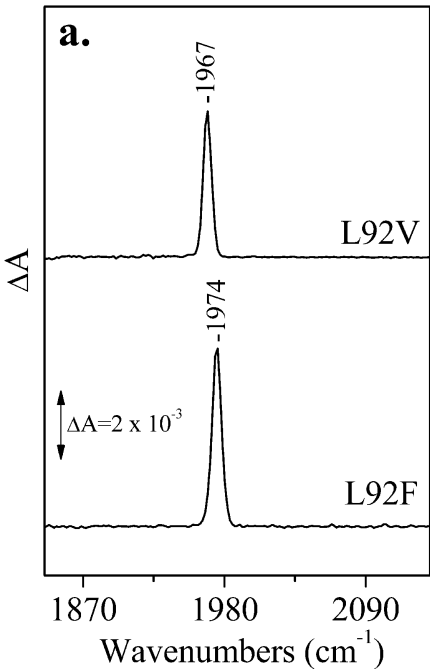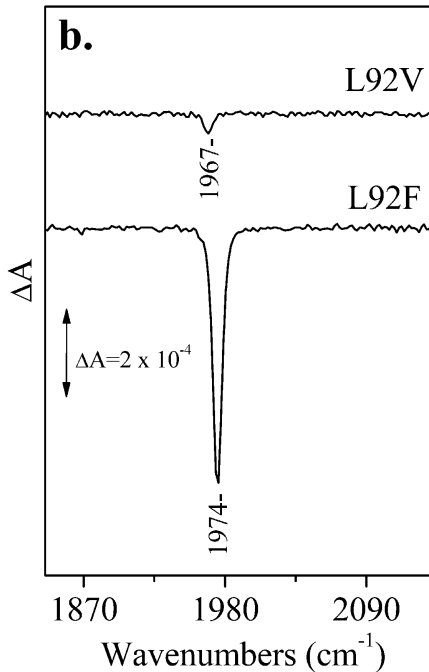

Supplement: pnas_0604248103_1.pdf [file pnas_0604248103_1.pdf]

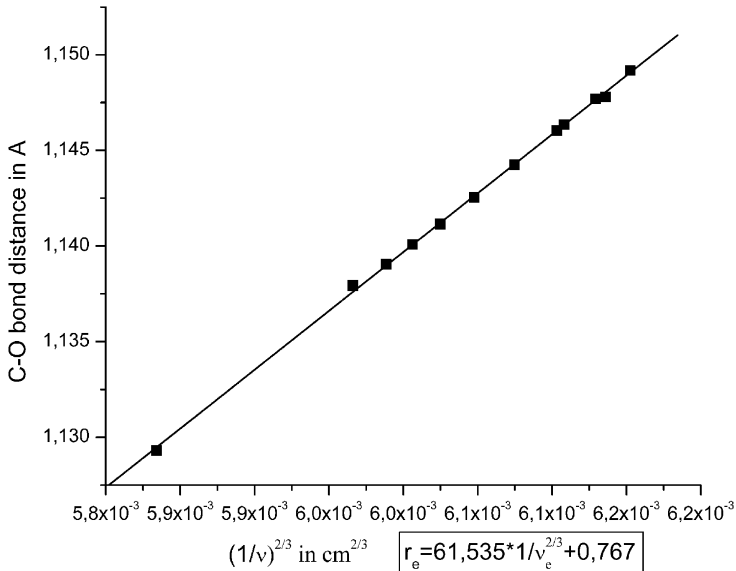

Supplement: pnas_0604248103_4.pdf [file pnas_0604248103_4.pdf]

Y133F

HemAT Full Length

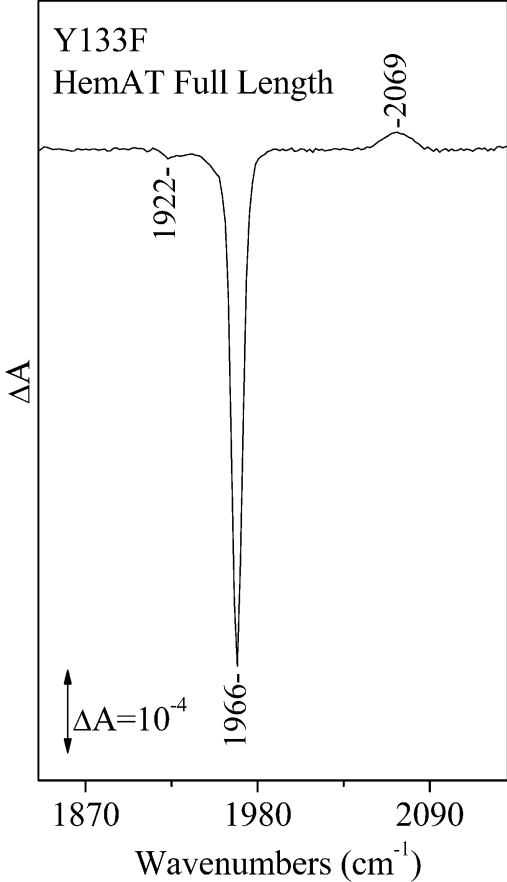

Supplement: pnas_0604248103_5.pdf [file pnas_0604248103_5.pdf]
